# Supplementary material for: Effects of age, sex, and genotype on high-sensitivity metabolomic profiles in the fruit fly, Drosophila melanogaster
Source: PubMed Central journal article supplement (PMC4116462; doi:10.1111/acel.12215), 2014-03-18

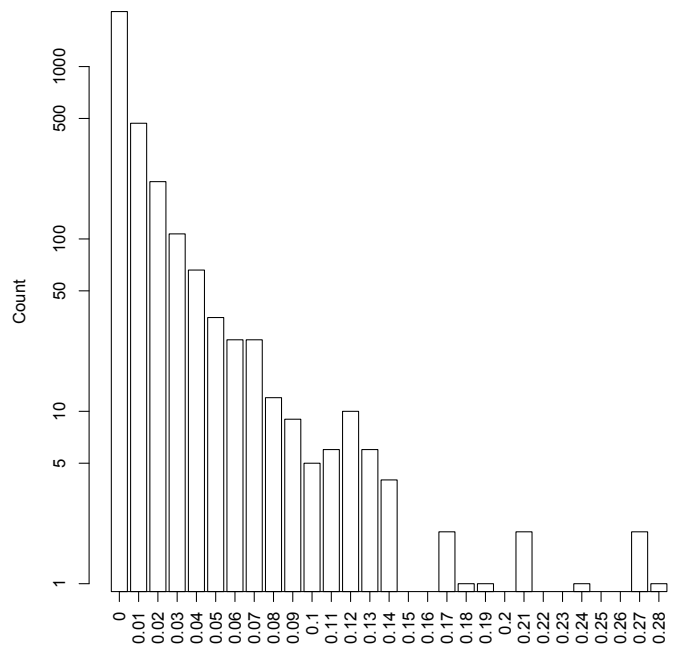

AE Heritability

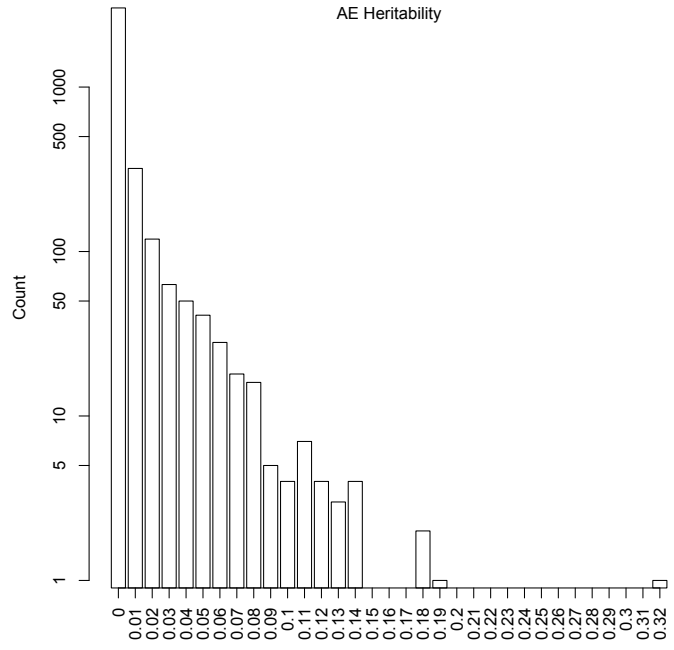

C18 Heritability

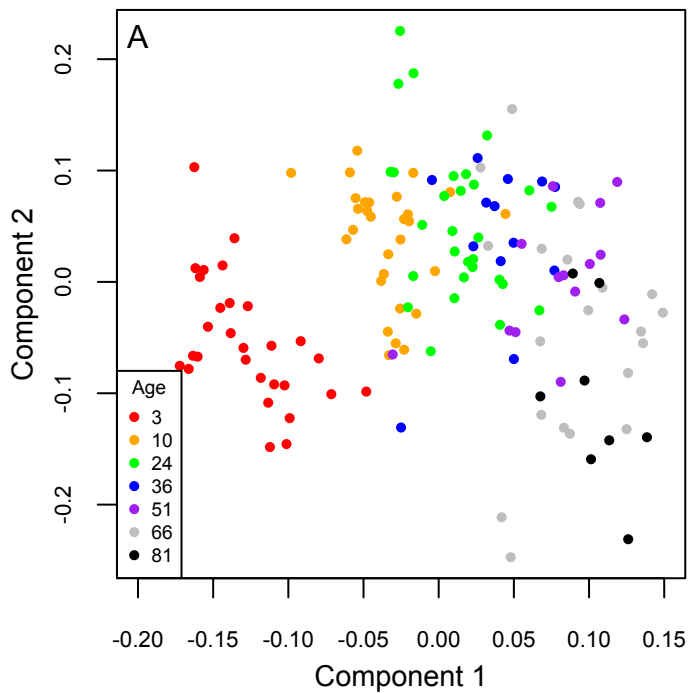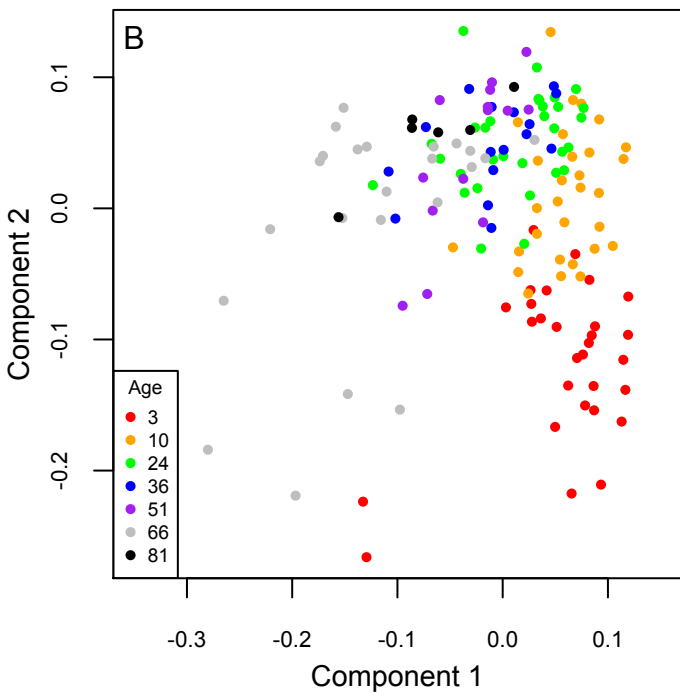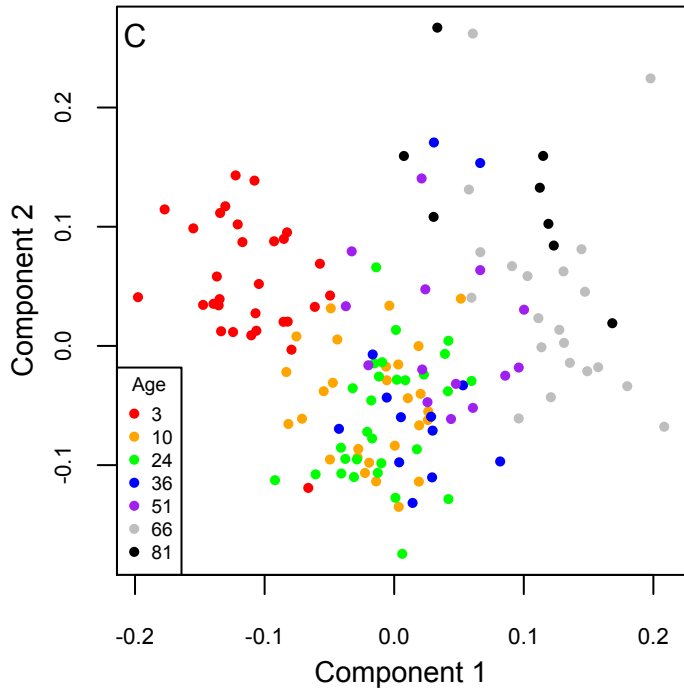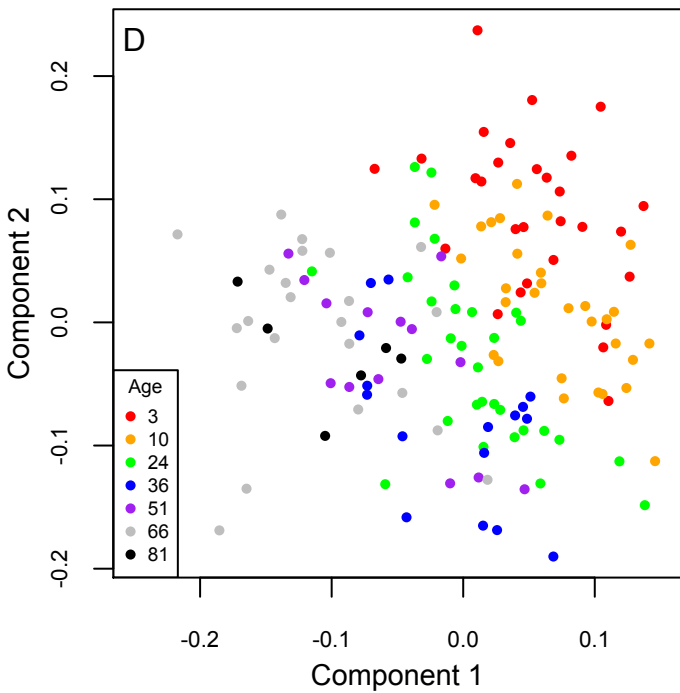

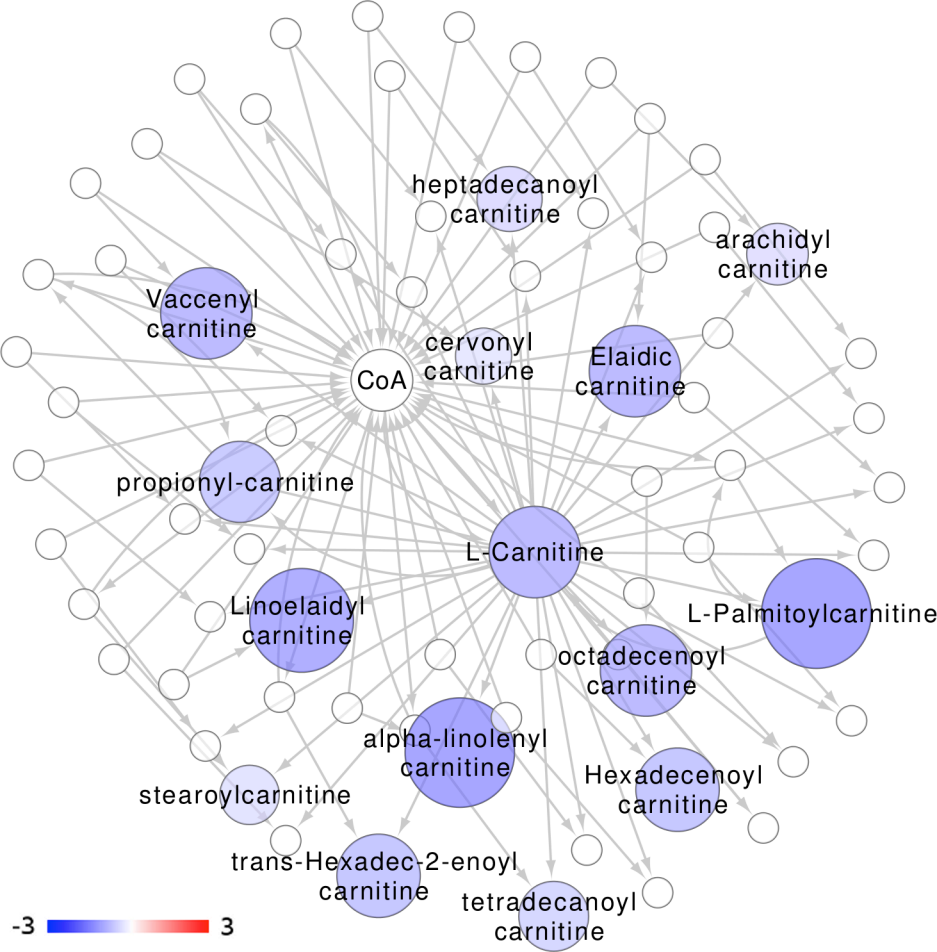

Supplement: NIHMS570688-supplement-Supp_Fig_S1-S3.pdf [file NIHMS570688-supplement-Supp_Fig_S1-S3.pdf]
